# Supplementary material for: Unraveling the genetic origin of ‘Glera’, ‘Ribolla Gialla’ and other autochthonous grapevine varieties from Friuli Venezia Giulia (northeastern Italy)
Source: PubMed Central journal article supplement (PMC7190720; doi:10.1038/s41598-020-64061-w), 2020-04-29
Supplement: 41598_2020_64061_MOESM1_ESM.pdf [file 41598_2020_64061_MOESM1_ESM.pdf]

Unraveling the genetic origin of 'Glera', 'Ribolla Gialla' and other autochthonous grapevine varieties from Friuli Venezia Giulia (northeastern Italy)

Manna Crespan, Daniele Migliaro, Simone Larger, Massimo Pindo, Carlo Petrusi, Marco Stocco, Denis Rusjan, Paolo Sivilotti, Riccardo Velasco, Erika Maul

Table 1S - List of the analysed samples. Non-FVG varieties are in italics; additional varieties with known pedigree relationships used as reference for computation are in bold.

| ID | VIVC prime name           | Variety/accession name         | Repository (Institute code)                                  | Country of origin | Variety Number VIVC |
|----|---------------------------|--------------------------------|--------------------------------------------------------------|-------------------|---------------------|
| 1  | AGHEDENE B                | Aghedene                       | CREA-Viticulture and Enology, Susegana (TV) (ITA388)         | ITALY             | 23351               |
| 2  | BERZAMINO N               | Berzamino                      | CREA-Viticulture and Enology, Susegana (TV) (ITA388)         | ITALY             | 24422               |
| 3  | BIANCHETTA TREVIGIANA B   | <i>Bianchetta trevigiana</i>   | CREA-Viticulture and Enology, Susegana (TV) (ITA388)         | ITALY             | 1329                |
| 4  | BLANCIAS B                | Blanchias*                     | CREA-Viticulture and Enology, Susegana (TV) (ITA388)         | ITALY             | 24448               |
| 5  | BRAMBANA                  | Brambana                       | CREA-Viticulture and Enology, Susegana (TV) (ITA388)         | ITALY             | 1663                |
| 6  | CIVIDIN BIANCO B          | Cividin                        | CREA-Viticulture and Enology, Susegana (TV) (ITA388)         | ITALY             | 2690                |
| 7  | CIANORIE N                | Cjanorie                       | CREA-Viticulture and Enology, Susegana (TV) (ITA388)         | ITALY             | 2644                |
| 8  | CJAVALGIAN N              | Cjavalgian                     | ERSA, Maniago (Pordenone), Italy                             | ITALY             | 23349               |
| 9  | CODELUNGE N               | Codelunghe                     | CREA-Viticulture and Enology, Susegana (TV) (ITA388)         | ITALY             | 2744                |
| 10 | CORBINONA N               | Corbina                        | CREA-Viticulture and Enology, Susegana (TV) (ITA388)         | ITALY             | 24567               |
| 11 | CORDENOSSA N              | Cordenossa                     | CREA-Viticulture and Enology, Susegana (TV) (ITA388)         | ITALY             | 23018               |
| 12 | CREMIN N                  | Cremin*                        | CREA-Viticulture and Enology, Susegana (TV) (ITA388)         | ITALY             | 24451               |
| 13 | CUNEUTE N                 | Cuneute                        | CREA-Viticulture and Enology, Susegana (TV) (ITA388)         | ITALY             | 3293                |
| 14 | CURVIN N                  | Curvin                         | ERSA, Maniago (Pordenone), Italy                             | ITALY             | 24452               |
| 15 | DURIESE B                 | Durriese                       | ERSA, Maniago (Pordenone), Italy                             | ITALY             | 24530               |
| 16 | FORZARIN N                | Forgiarin                      | CREA-Viticulture and Enology, Susegana (TV) (ITA388)         | ITALY             | 4202                |
| 17 | FUMAT N                   | Fumat                          | CREA-Viticulture and Enology, Susegana (TV) (ITA388)         | ITALY             | 24418               |
| 18 | GARGANEGA B               | <i>Garganega</i>               | CREA-Viticulture and Enology, Susegana (TV) (ITA388)         | ITALY             | 4419                |
| 19 | GLERA B                   | Glera                          | CREA-Viticulture and Enology, Susegana (TV) (ITA388)         | ITALY             | 9741                |
| 20 | BELA DINKA B              | Glera lunga                    | CREA-Viticulture and Enology, Susegana (TV) (ITA388)         | SERBIA            | 16848               |
| 21 | GRAN RAP NERI N           | Gran rap neri*                 | CREA-Viticulture and Enology, Susegana (TV) (ITA388)         | ITALY             | 24455               |
| 22 | HEUNISCH DREIFARBIG RS    | <i>Heunisch dreifarbig</i>     | JKI, Institute for Grapevine Breeding Geilweilerhof (DEU098) | AUSTRIA           | 24544               |
| 23 | HEUNISCH ROTGESTREIFT B   | <i>Heunisch rotgestreift</i>   | JKI, Institute for Grapevine Breeding Geilweilerhof (DEU098) | AUSTRIA           | 5373                |
| 24 | HEUNISCH WEISS B          | <i>Heunisch weiss</i>          | JKI, Institute for Grapevine Breeding Geilweilerhof (DEU098) |                   | 5374                |
| 25 | HEUNISCH WEISS SEEDLESS B | <i>Heunisch weiss seedless</i> | JKI, Institute for Grapevine Breeding Geilweilerhof (DEU098) |                   | 699                 |
| 26 | HONIGLER B                | <i>Honigler</i>                | CREA-Viticulture and Enology, Susegana (TV) (ITA388)         | HUNGARY           | 5417                |
| 27 | KLARNICA B                | <i>Klarnica</i>                | STS - Vrhoplje (Vipava) (SVN018)                             | SLOVENIA          | 40687               |
| 28 | HEUNISCH WEISS B          | <i>Liseiret</i>                | CREA-Viticulture and Enology, Susegana (TV) (ITA388)         |                   | 5374                |
| 29 | MALVASIA BIANCA LUNGA B   | <b>Malvasia bianca lunga</b>   | CREA-Viticulture and Enology, Susegana (TV) (ITA388)         | ITALY             | 7262                |
| 30 | MALVASIA ISTRIANA B       | Malvasia istriana              | CREA-Viticulture and Enology, Susegana (TV) (ITA388)         | CROATIA           | 7269                |
| 31 | MANZONI BIANCO B          | <b>Manzoni bianco</b>          | CREA-Viticulture and Enology, Susegana (TV) (ITA388)         | ITALY             | 7360                |
| 32 | MARZEMINA BIANCA B        | <b>Marzemina bianca</b>        | CREA-Viticulture and Enology, Susegana (TV) (ITA388)         | ITALY             | 16944               |
| 33 | MARZEMINO N               | <i>Marzemino</i>               | CREA-Viticulture and Enology, Susegana (TV) (ITA388)         | ITALY             | 7463                |
| 34 | MOCULA B                  | Mocula*                        | CREA-Viticulture and Enology, Susegana (TV) (ITA388)         | ITALY             | 24456               |
| 35 | NEGRAT N                  | Negrat                         | ERSA, Maniago (Pordenone), Italy                             | ITALY             | 8450                |
| 36 | NERATA N                  | Nerata*                        | ERSA, Maniago (Pordenone), Italy                             | ITALY             | 24457               |
| 37 | NIGRUT N                  | Nigrut*                        | CREA-Viticulture and Enology, Susegana (TV) (ITA388)         | ITALY             | 24458               |
| 38 | PALOMBA N                 | Palomba nera                   | ERSA, Maniago (Pordenone), Italy                             | ITALY             | 20370               |
| 39 | PELENA B                  | Pelena*                        | ERSA, Maniago (Pordenone), Italy                             | ITALY             | 24459               |
| 40 | PICCOLA NERA RS           | Piccola nera                   | CREA-Viticulture and Enology, Susegana (TV) (ITA388)         | ITALY             | 9235                |
| 41 | PICULE N                  | Picule*                        | CREA-Viticulture and Enology, Susegana (TV) (ITA388)         | ITALY             | 24460               |
| 42 | PICOLIT B                 | Picolit                        | Vivai Cooperativi di Rauscedo (Pordenone), Italy             | ITALY             | 9236                |
| 43 | PICOLIT NERO N            | Piculit neri                   | CREA-Viticulture and Enology, Susegana (TV) (ITA388)         | ITALY             | 9238                |
| 44 | PIGNOLO N                 | Pignolo                        | CREA-Viticulture and Enology, Susegana (TV) (ITA388)         | ITALY             | 9255                |
| 45 | PINELLA B                 | Pinella                        | CREA-Viticulture and Enology, Susegana (TV) (ITA388)         | ITALY             | 9266                |

|    |                               |                             |                                                      |          |       |
|----|-------------------------------|-----------------------------|------------------------------------------------------|----------|-------|
| 46 | PINOT NOIR N                  | <b>Pinot noir</b>           | CREA-Viticulture and Enology, Susegana (TV) (ITA388) | FRANCE   | 9279  |
| 47 | POLPOSA B                     | Polposa*                    | CREA-Viticulture and Enology, Susegana (TV) (ITA388) | ITALY    | 24462 |
| 48 | RABOSO PIAVE N                | <b>Raboso Piave</b>         | CREA-Viticulture and Enology, Susegana (TV) (ITA388) | ITALY    | 9864  |
| 49 | RABOSO VERONESE N             | <b>Raboso veronese</b>      | CREA-Viticulture and Enology, Susegana (TV) (ITA388) | ITALY    | 9865  |
| 50 | RIBOLLA GIALLA B              | Rebula                      | STS - Vrhpolje (Vipava) (SVN018)                     | ITALY    | 10054 |
| 51 | HEUNISCH WEISS B              | <i>Rebula stara</i>         | STS - Vrhpolje (Vipava) (SVN018)                     |          | 5374  |
| 52 | REFOSCO BIANCO B              | Refosco bianco              | CREA-Viticulture and Enology, Susegana (TV) (ITA388) | ITALY    | 24463 |
| 53 | REFOSCO NOSTRANO N            | Refosco nostrano            | CREA-Viticulture and Enology, Susegana (TV) (ITA388) | ITALY    | 9989  |
| 54 | REFOSCO DAL PEDUNCOLO ROSSO N | Refosco dal peduncolo rosso | CREA-Viticulture and Enology, Susegana (TV) (ITA388) | ITALY    | 9987  |
| 55 | REFOSCO GENTILE N             | Refosco di Rauscedo*        | ERSA, Maniago (Pordenone), Italy                     | ITALY    | 24536 |
| 56 | RIBOLLA GIALLA B              | Ribolla gialla              | CREA-Viticulture and Enology, Susegana (TV) (ITA388) | ITALY    | 10054 |
| 57 | RIESLING WEISS B              | <b>Riesling</b>             | CREA-Viticulture and Enology, Susegana (TV) (ITA388) | GERMANY  | 10077 |
| 58 | GOUSTOLIDI B                  | <i>Robolla</i>              | Vivai Cooperativi di Rauscedo (Pordenone), Italy     | GREECE   | 5000  |
| 59 | RUACIT B                      | Ruacit                      | CREA-Viticulture and Enology, Susegana (TV) (ITA388) | ITALY    | 24464 |
| 60 | SAGRESTANA B                  | Sagrestana*                 | CREA-Viticulture and Enology, Susegana (TV) (ITA388) | ITALY    | 23350 |
| 61 | SAUVIGNON BLANC B             | <b>Sauvignon</b>            | CREA-Viticulture and Enology, Susegana (TV) (ITA388) | FRANCE   | 10790 |
| 62 | ZIMMETTRAUBE BLAU N           | Sbulzina*                   | CREA-Viticulture and Enology, Susegana (TV) (ITA388) | SLOVENIA | 24493 |
| 63 | SCHIOPPETTINO N               | Schioppettino               | CREA-Viticulture and Enology, Susegana (TV) (ITA388) | ITALY    | 10830 |
| 64 | SCIAGLIN B                    | Sciaglin                    | CREA-Viticulture and Enology, Susegana (TV) (ITA388) | ITALY    | 17607 |
| 65 | SIORA N                       | Siora*                      | CREA-Viticulture and Enology, Susegana (TV) (ITA388) | ITALY    | 24467 |
| 66 | TAZZELENICHE N                | Tazzelenghe                 | CREA-Viticulture and Enology, Susegana (TV) (ITA388) | ITALY    | 12291 |
| 67 | TEROLDEGO N                   | <i>Teroldego</i>            | CREA-Viticulture and Enology, Susegana (TV) (ITA388) | ITALY    | 12371 |
| 68 | TERRANO N                     | Terrano                     | CREA-Viticulture and Enology, Susegana (TV) (ITA388) | ITALY    | 12374 |
| 69 | TINTORIA LLOYD N              | Tintoria Lloyd              | CREA-Viticulture and Enology, Susegana (TV) (ITA388) | ITALY    | 24446 |
| 70 | FRIULANO B                    | Tocai friulano              | CREA-Viticulture and Enology, Susegana (TV) (ITA388) | ITALY    | 12543 |
| 71 | GEWUERZTRAMINER RG            | <b>Traminer</b>             | CREA-Viticulture and Enology, Susegana (TV) (ITA388) |          | 12609 |
| 72 | UCELUT B                      | Ucelut                      | CREA-Viticulture and Enology, Susegana (TV) (ITA388) | ITALY    | 12753 |
| 73 | VENERE B                      | Venere*                     | CREA-Viticulture and Enology, Susegana (TV) (ITA388) | ITALY    | 24468 |
| 74 | VERDUZZO FRIULANO B           | Verduzzo friulano           | CREA-Viticulture and Enology, Susegana (TV) (ITA388) | ITALY    | 12976 |
| 75 | VINOSO ROSSO N                | Vinoso rosso                | CREA-Viticulture and Enology, Susegana (TV) (ITA388) | ITALY    | 24469 |
| 76 | VITOVSKA B                    | Vitouska                    | CREA-Viticulture and Enology, Susegana (TV) (ITA388) | SLOVENIA | 24412 |
| 77 | VELA PERGOLA B                | <i>Volovnik</i>             | STS - Vrhpolje (Vipava) (SVN018)                     | CROATIA  | 22299 |
| 78 | VUBOLA B                      | Vubola*                     | ERSA, Maniago (Pordenone), Italy                     | ITALY    | 24470 |
| 79 | VULPEA N                      | <i>Vulpea</i>               | CREA-Viticulture and Enology, Susegana (TV) (ITA388) | AUSTRIA  | 13186 |

\*fantasy name made-up by the collector

Table 2S - Chlorotypes and nSSR profiles of the analyzed varieties. The original varietal names reported in Table 1S are here in brackets, when a different prime name is available. Chlorotypes are codified in letters following <sup>19</sup>; allele lengths are in bp. Non-FVG varieties recognized as members of trios or duos are listed as additional varieties.

| Varieties of Friuli Venezia Giulia | Chlorotype | VVS2    | VVMD27  | VVMD7   | ISV2<br>(VMC6E1) | VrZAG62 | VVMD5   | VMCNG4B9 | VrZAG79 | ISV4<br>(VMC6G1) | VVMD28  | VVMD25  | VVMD32  |
|------------------------------------|------------|---------|---------|---------|------------------|---------|---------|----------|---------|------------------|---------|---------|---------|
| Aghedene                           | D          | 135 155 | 185 194 | 239 247 | 141 151          | 193 195 | 226 246 | 150 176  | 242 248 | 177 187          | 247 251 | 247 259 | 257 273 |
| Berzamino                          | A          | 151 155 | 181 185 | 257 263 | 165 169          | 193 195 | 232 240 | 162 172  | 250 258 | 169 177          | 249 271 | 261 267 | 253 263 |
| Blanchias                          | C          | 133 153 | 181 189 | 247 249 | 141 143          | 199 203 | 226 234 | 138 176  | 242 250 | 177 177          | 239 249 | 245 245 | 251 263 |
| Brambana                           | D          | 135 151 | 185 189 | 247 257 | 151 161          | 195 203 | 232 236 | 158 158  | 242 250 | 169 191          | 261 271 | 253 259 | 273 273 |
| Cividin                            | D          | 141 143 | 181 185 | 247 247 | 141 143          | 195 201 | 236 238 | 150 162  | 242 258 | 169 191          | 247 261 | 259 261 | 241 273 |
| Cjanorie                           | D          | 133 155 | 185 194 | 239 249 | 141 151          | 187 199 | 226 228 | 158 162  | 242 248 | 169 197          | 237 251 | 243 261 | 265 273 |
| Cjavalgian                         | D          | 139 151 | 179 194 | 247 263 | 151 161          | 193 203 | 226 228 | 158 158  | 250 250 | 169 169          | 247 261 | 243 253 | 241 253 |
| Codelunghe                         | D          | 133 151 | 179 181 | 249 263 | 165 165          | 193 199 | 226 228 | 158 178  | 250 258 | 169 177          | 251 261 | 245 253 | 241 251 |
| Corbina                            | A          | 135 155 | 185 189 | 249 257 | 151 165          | 191 195 | 232 232 | 162 178  | 242 250 | 169 169          | 239 267 | 259 261 | 263 273 |
| Cordenossa                         | A          | 135 155 | 181 189 | 239 263 | 141 161          | 187 193 | 226 228 | 158 158  | 250 258 | 169 187          | 251 267 | 259 259 | 241 265 |
| Cremin                             | D          | 133 143 | 189 191 | 239 263 | 151 151          | 193 193 | 226 236 | 150 168  | 250 250 | 169 177          | 239 247 | 245 259 | 273 273 |
| Cuneute                            | D          | 143 155 | 185 185 | 247 263 | 141 165          | 193 203 | 232 236 | 162 166  | 242 250 | 169 197          | 231 237 | 259 261 | 263 273 |
| Curvin                             | D          | 135 151 | 181 181 | 247 257 | 151 161          | 193 195 | 232 236 | 158 178  | 258 258 | 169 169          | 239 261 | 253 259 | 253 273 |
| Durriese                           | D          | 133 151 | 185 189 | 247 257 | 141 165          | 193 203 | 228 228 | 162 166  | 248 250 | 169 177          | 237 237 | 245 267 | 253 253 |
| Forgiarin                          | A          | 133 141 | 181 189 | 247 257 | 151 165          | 193 203 | 232 240 | 164 184  | 250 258 | 187 187          | 247 267 | 243 253 | 257 273 |
| Fumat                              | A          | 133 151 | 185 191 | 249 261 | 161 165          | 193 199 | 228 236 | 168 172  | 242 260 | 191 191          | 231 271 | 245 257 | 253 273 |
| Gran Rap Neri                      | D          | 155 155 | 185 189 | 247 249 | 141 165          | 191 193 | 226 232 | 176 178  | 242 250 | 169 177          | 247 267 | 247 261 | 263 273 |
| Malvasia Istriana                  | D          | 143 143 | 179 179 | 239 239 | 161 165          | 187 187 | 222 240 | 138 168  | 236 254 | 191 197          | 257 281 | 259 259 | 257 273 |
| Mocula                             | C          | 153 155 | 179 194 | 239 247 | 151 165          | 195 203 | 226 234 | 138 150  | 248 258 | 177 177          | 247 251 | 245 247 | 251 273 |
| Negrat                             | D          | 133 135 | 185 189 | 247 257 | 141 151          | 195 203 | 232 232 | 158 158  | 250 250 | 169 169          | 231 237 | 253 259 | 241 253 |
| Nerata                             | A          | 135 151 | 179 181 | 239 249 | 169 169          | 187 199 | 236 236 | 166 172  | 258 258 | 169 177          | 237 249 | 259 267 | 253 273 |
| Nigrut                             | D          | 155 155 | 185 189 | 239 247 | 151 165          | 193 195 | 226 228 | 162 166  | 242 250 | 169 169          | 239 239 | 245 253 | 253 273 |
| Palomba Nera                       | C          | 135 143 | 189 194 | 247 247 | 151 151          | 193 195 | 226 232 | 150 158  | 250 256 | 169 169          | 239 251 | 259 259 | 241 265 |
| Pelena                             | D          | 133 145 | 179 179 | 239 239 | 151 165          | 187 195 | 240 246 | 150 166  | 242 258 | 177 197          | 247 257 | 243 243 | 253 263 |
| Piccola Nera                       | C          | 133 133 | 181 181 | 239 249 | 141 165          | 195 203 | 228 234 | 138 158  | 242 258 | 197 197          | 231 239 | 243 243 | 257 273 |
| Picule                             | D          | 133 155 | 181 189 | 239 257 | 141 151          | 195 195 | 228 232 | 166 176  | 250 258 | 169 197          | 251 267 | 243 259 | 265 273 |
| Picolit                            | D          | 135 139 | 181 185 | 247 247 | 141 161          | 191 203 | 232 238 | 164 168  | 238 258 | 169 177          | 231 237 | 243 259 | 241 251 |
| Piculit Neri                       | A          | 135 151 | 179 194 | 239 263 | 141 145          | 193 195 | 232 246 | 158 162  | 248 250 | 169 187          | 239 267 | 259 259 | 241 265 |
| Pignolo                            | D          | 133 155 | 179 191 | 247 257 | 141 167          | 193 195 | 226 232 | 150 158  | 250 258 | 177 177          | 239 247 | 247 259 | 241 273 |
| Pinella                            | D          | 133 133 | 179 181 | 247 249 | 141 143          | 203 203 | 232 234 | 158 168  | 242 250 | 197 197          | 231 261 | 243 253 | 257 273 |
| Polposa                            | A          | 133 155 | 181 185 | 239 249 | 165 169          | 187 199 | 226 232 | 162 164  | 242 250 | 169 187          | 237 249 | 243 261 | 253 257 |
| Refosco Bianco                     | D          | 135 151 | 185 191 | 249 257 | 151 165          | 195 199 | 228 232 | 158 162  | 250 258 | 169 169          | 247 271 | 259 267 | 253 263 |
| Refosco dal Peduncolo Rosso        | D          | 133 133 | 181 189 | 239 247 | 141 165          | 193 193 | 226 232 | 158 168  | 250 258 | 169 177          | 237 239 | 245 259 | 251 263 |
| Refosco Nostrano                   | A          | 151 155 | 185 185 | 249 263 | 165 165          | 193 199 | 226 232 | 162 168  | 242 250 | 169 169          | 237 271 | 261 267 | 253 265 |
| Refosco di Rauscedo                | D          | 133 155 | 179 185 | 247 263 | 143 165          | 193 203 | 226 226 | 150 168  | 250 258 | 169 169          | 237 247 | 245 261 | 253 263 |
| Ribolla Gialla                     | A          | 143 151 | 179 185 | 239 249 | 165 169          | 195 199 | 232 234 | 158 172  | 236 250 | 191 197          | 231 237 | 259 267 | 251 253 |
| Ruacit                             | C          | 143 151 | 181 194 | 247 247 | 141 159          | 191 203 | 226 226 | 138 176  | 248 258 | 191 197          | 237 249 | 259 267 | 263 273 |
| Sagrestana                         | D          | 139 151 | 181 191 | 239 247 | 141 169          | 187 191 | 226 232 | 164 164  | 250 258 | 177 177          | 231 249 | 243 259 | 241 251 |
| Zimmettraube Blau (Sbulzina)       | C          | 143 143 | 181 194 | 239 255 | 141 169          | 193 203 | 226 226 | 150 158  | 250 258 | 177 197          | 249 263 | 253 259 | 253 273 |
| Schioppettino                      | A          | 135 139 | 181 189 | 239 249 | 141 169          | 187 191 | 228 232 | 162 176  | 250 258 | 187 191          | 237 239 | 243 259 | 257 273 |
| Sciaglin                           | D          | 133 135 | 179 179 | 247 263 | 141 161          | 191 193 | 228 232 | 150 162  | 250 258 | 169 169          | 231 237 | 259 259 | 257 263 |
| Siora                              | A          | 133 139 | 181 181 | 239 249 | 141 165          | 195 199 | 228 232 | 158 178  | 248 258 | 169 197          | 237 239 | 243 243 | 265 273 |
| Tazzelenghe                        | D          | 151 153 | 185 185 | 249 263 | 151 165          | 195 199 | 228 232 | 162 178  | 242 250 | 169 169          | 237 261 | 267 271 | 253 273 |
| Terrano                            | D          | 135 155 | 189 189 | 247 249 | 141 143          | 191 193 | 226 228 | 150 158  | 238 250 | 169 169          | 221 237 | 245 259 | 251 273 |
| Tintoria Lloyd                     | A          | 133 151 | 189 194 | 239 247 | 151 165          | 193 195 | 236 238 | 158 158  | 244 250 | 169 191          | 231 237 | 253 259 | 253 273 |

|                   |   |     |     |     |     |     |     |     |     |     |     |     |     |     |     |     |     |     |     |     |     |     |     |     |     |
|-------------------|---|-----|-----|-----|-----|-----|-----|-----|-----|-----|-----|-----|-----|-----|-----|-----|-----|-----|-----|-----|-----|-----|-----|-----|-----|
| Tocai Friulano    | A | 133 | 151 | 185 | 194 | 239 | 257 | 141 | 151 | 187 | 193 | 228 | 238 | 164 | 166 | 250 | 250 | 169 | 177 | 237 | 251 | 245 | 253 | 241 | 257 |
| Ucelut            | D | 133 | 143 | 179 | 189 | 249 | 263 | 151 | 159 | 193 | 199 | 228 | 236 | 158 | 176 | 250 | 254 | 177 | 177 | 237 | 237 | 245 | 259 | 263 | 273 |
| Venere            | D | 135 | 151 | 181 | 185 | 247 | 263 | 141 | 169 | 193 | 203 | 226 | 232 | 164 | 168 | 238 | 258 | 169 | 177 | 231 | 239 | 259 | 259 | 241 | 251 |
| Verduzzo Friulano | A | 133 | 151 | 181 | 191 | 239 | 263 | 159 | 169 | 187 | 193 | 226 | 236 | 164 | 178 | 250 | 258 | 177 | 187 | 239 | 249 | 243 | 259 | 241 | 257 |
| Vinoso Rosso      | D | 155 | 155 | 185 | 191 | 247 | 249 | 151 | 165 | 199 | 203 | 226 | 226 | 162 | 162 | 242 | 250 | 169 | 169 | 237 | 267 | 259 | 261 | 253 | 273 |
| Vubola            | A | 135 | 143 | 185 | 194 | 239 | 257 | 143 | 167 | 187 | 195 | 226 | 228 | 162 | 176 | 242 | 248 | 177 | 187 | 247 | 251 | 259 | 259 | 273 | 273 |

#### Additional varieties

|                         |   |     |     |     |     |     |     |     |     |     |     |     |     |     |     |     |     |     |     |     |     |     |     |     |     |
|-------------------------|---|-----|-----|-----|-----|-----|-----|-----|-----|-----|-----|-----|-----|-----|-----|-----|-----|-----|-----|-----|-----|-----|-----|-----|-----|
| Bianchetta Trevigiana   | D | 135 | 151 | 185 | 189 | 247 | 247 | 151 | 161 | 195 | 203 | 236 | 238 | 150 | 158 | 242 | 244 | 169 | 191 | 247 | 271 | 253 | 259 | 241 | 273 |
| Garganega               | D | 133 | 143 | 179 | 194 | 249 | 253 | 141 | 165 | 199 | 199 | 226 | 232 | 176 | 178 | 250 | 250 | 177 | 187 | 239 | 251 | 245 | 259 | 251 | 259 |
| Glera Lunga             | D | 133 | 143 | 179 | 194 | 239 | 247 | 141 | 167 | 187 | 193 | 226 | 246 | 150 | 158 | 248 | 258 | 169 | 197 | 239 | 247 | 243 | 259 | 257 | 273 |
| Goussolidi (Robolla)    | C | 143 | 145 | 179 | 181 | 239 | 249 | 161 | 165 | 195 | 201 | 226 | 234 | 158 | 172 | 236 | 258 | 177 | 197 | 231 | 261 | 245 | 259 | 251 | 273 |
| Heunisch Weiss          | C | 133 | 143 | 179 | 181 | 239 | 249 | 143 | 165 | 195 | 203 | 234 | 240 | 138 | 158 | 236 | 242 | 197 | 197 | 231 | 249 | 243 | 259 | 251 | 273 |
| Honigler                | A | 143 | 145 | 181 | 194 | 243 | 247 | 151 | 165 | 187 | 203 | 226 | 232 | 138 | 178 | 250 | 258 | 169 | 177 | 251 | 263 | 245 | 259 | 249 | 253 |
| Klarnica                | A | 139 | 143 | 189 | 194 | 239 | 249 | 141 | 169 | 187 | 199 | 226 | 228 | 150 | 162 | 250 | 250 | 169 | 191 | 237 | 247 | 243 | 259 | 257 | 273 |
| Marzemino               | D | 133 | 133 | 185 | 189 | 239 | 263 | 151 | 165 | 193 | 193 | 226 | 232 | 158 | 168 | 242 | 250 | 169 | 177 | 237 | 239 | 245 | 259 | 241 | 263 |
| Sauvignon               | D | 133 | 151 | 175 | 189 | 239 | 257 | 141 | 151 | 187 | 193 | 228 | 232 | 168 | 172 | 244 | 246 | 169 | 177 | 237 | 239 | 245 | 253 | 241 | 257 |
| Teroldego               | D | 137 | 155 | 179 | 185 | 239 | 247 | 161 | 165 | 193 | 193 | 226 | 228 | 158 | 168 | 242 | 254 | 177 | 177 | 231 | 239 | 243 | 245 | 241 | 263 |
| Traminer                | D | 151 | 151 | 189 | 189 | 243 | 257 | 151 | 161 | 187 | 193 | 232 | 238 | 158 | 168 | 244 | 250 | 169 | 169 | 237 | 239 | 253 | 253 | 241 | 273 |
| Vela pergola (Volovnik) | A | 133 | 151 | 179 | 181 | 239 | 247 | 165 | 169 | 187 | 203 | 226 | 240 | 164 | 172 | 250 | 258 | 177 | 187 | 247 | 249 | 243 | 267 | 253 | 257 |
| Vulpea                  | D | 133 | 135 | 181 | 194 | 239 | 239 | 141 | 141 | 187 | 195 | 228 | 246 | 158 | 176 | 248 | 258 | 187 | 197 | 239 | 251 | 243 | 259 | 257 | 265 |

#### Supporting trios

|                  |   |     |     |     |     |     |     |     |     |     |     |     |     |     |     |     |     |     |     |     |     |     |     |     |     |
|------------------|---|-----|-----|-----|-----|-----|-----|-----|-----|-----|-----|-----|-----|-----|-----|-----|-----|-----|-----|-----|-----|-----|-----|-----|-----|
| Raboso Piave     | D | 135 | 143 | 185 | 189 | 247 | 257 | 151 | 151 | 195 | 195 | 228 | 232 | 158 | 158 | 242 | 250 | 169 | 191 | 237 | 237 | 259 | 259 | 273 | 273 |
| Raboso Veronese  | D | 133 | 135 | 185 | 185 | 239 | 257 | 151 | 165 | 193 | 195 | 232 | 238 | 158 | 166 | 242 | 250 | 169 | 169 | 237 | 239 | 245 | 259 | 251 | 273 |
| Marzemina Bianca | D | 133 | 133 | 185 | 194 | 239 | 253 | 141 | 165 | 193 | 199 | 226 | 238 | 166 | 176 | 248 | 250 | 169 | 177 | 239 | 239 | 245 | 245 | 251 | 253 |

|                       |   |     |     |     |     |     |     |     |     |     |     |     |     |     |     |     |     |     |     |     |     |     |     |     |     |
|-----------------------|---|-----|-----|-----|-----|-----|-----|-----|-----|-----|-----|-----|-----|-----|-----|-----|-----|-----|-----|-----|-----|-----|-----|-----|-----|
| Glera                 | D | 133 | 143 | 179 | 194 | 239 | 247 | 141 | 151 | 187 | 203 | 226 | 246 | 166 | 176 | 248 | 258 | 169 | 197 | 239 | 247 | 243 | 247 | 263 | 265 |
| Vitouska              | D | 133 | 145 | 179 | 194 | 239 | 247 | 151 | 165 | 195 | 203 | 226 | 240 | 166 | 176 | 242 | 248 | 177 | 197 | 239 | 257 | 243 | 245 | 253 | 263 |
| Malvasia Bianca Lunga | D | 145 | 145 | 179 | 179 | 239 | 253 | 143 | 165 | 195 | 199 | 226 | 240 | 150 | 176 | 242 | 250 | 177 | 177 | 251 | 257 | 243 | 245 | 253 | 257 |

|                |   |     |     |     |     |     |     |     |     |     |     |     |     |     |     |     |     |     |     |     |     |     |     |     |     |
|----------------|---|-----|-----|-----|-----|-----|-----|-----|-----|-----|-----|-----|-----|-----|-----|-----|-----|-----|-----|-----|-----|-----|-----|-----|-----|
| Pinot          | A | 137 | 151 | 185 | 189 | 239 | 243 | 151 | 165 | 187 | 193 | 228 | 238 | 158 | 162 | 238 | 244 | 169 | 177 | 221 | 239 | 243 | 253 | 241 | 273 |
| Manzoni Bianco | A | 151 | 151 | 181 | 185 | 243 | 249 | 143 | 151 | 187 | 203 | 226 | 228 | 138 | 158 | 238 | 242 | 169 | 169 | 231 | 239 | 253 | 253 | 273 | 273 |
| Riesling Weiss | A | 143 | 151 | 181 | 189 | 249 | 257 | 143 | 151 | 193 | 203 | 226 | 234 | 138 | 168 | 242 | 244 | 169 | 197 | 231 | 237 | 253 | 259 | 253 | 273 |

Table 3S - 14 SNP profiles of the analyzed varieties. In brackets the original names reported in Table 1, if a different prime name is available.

| SNP name by Illumina                   | chr1_12168156_C_T | chr11_5406647_A_C | chr13_15640723_C_T | chr14_4353470_A_G | chr14_4947068_G_T | chr15_18127737_G_T | chr15_18567587_G_T | chr16_16198599_A_G | chr16_17950801_A_G | chr17_126505_A_G | chr18_11544918_C_T | chr3_5724485_C_T | chr8_12906774_C_T | chr9_5755442_C_T |
|----------------------------------------|-------------------|-------------------|--------------------|-------------------|-------------------|--------------------|--------------------|--------------------|--------------------|------------------|--------------------|------------------|-------------------|------------------|
| Chromosome                             | 1                 | 11                | 13                 | 14                | 14                | 15                 | 15                 | 16                 | 16                 | 17               | 18                 | 3                | 8                 | 9                |
| <b>Friuli Venezia Giulia varieties</b> |                   |                   |                    |                   |                   |                    |                    |                    |                    |                  |                    |                  |                   |                  |
| Aghedese                               | TC                | TG                | TC                 | GG                | TG                | TG                 | AC                 | AG                 | AG                 | AG               | CC                 | TT               | TC                | AG               |
| Berzaminò                              | TC                | TG                | TC                 | AA                | TT                | TG                 | AA                 | AG                 | AA                 | AG               | TC                 | TC               | CC                | AA               |
| Blanchias                              | TC                | TT                | TC                 | GG                | GG                | GG                 | CC                 | AG                 | AG                 | GG               | CC                 | TT               | CC                | AG               |
| Brambana                               | TC                | TT                | TC                 | GG                | GG                | TG                 | AC                 | AG                 | AA                 | AA               | TC                 | TC               | CC                | GG               |
| Cividin                                | TT                | TG                | TT                 | AA                | TT                | TT                 | AA                 | AG                 | GG                 | AA               | TC                 | TC               | TT                | AG               |
| Cjanorie                               | CC                | TT                | TT                 | AG                | TG                | GG                 | AA                 | GG                 | GG                 | AG               | CC                 | TC               | TC                | AG               |
| Cjavalgian                             | TC                | TG                | TC                 | AG                | TG                | TG                 | AC                 | AG                 | AG                 | AA               | TT                 | CC               | CC                | AG               |
| Codelunghe                             | CC                | TG                | TT                 | AG                | TT                | TG                 | AA                 | AA                 | AA                 | GG               | TT                 | CC               | TC                | GG               |
| Corbina                                | TC                | TG                | TT                 | AG                | TG                | TG                 | AG                 | AG                 | AG                 | AA               | TT                 | TC               | CC                | GG               |
| Cordenossa                             | CC                | TG                | TC                 | AA                | TG                | TG                 | CC                 | AG                 | AG                 | GG               | TC                 | TC               | TC                | GG               |
| Crenin                                 | TC                | TT                | TC                 | GG                | TG                | GG                 | AC                 | AG                 | AG                 | GG               | TT                 | AG               | TT                | AG               |
| Cunute                                 | TC                | TG                | TT                 | AA                | TT                | TG                 | AA                 | AG                 | AA                 | AA               | TT                 | TC               | TC                | AG               |
| Curvin                                 | TC                | TG                | TC                 | AG                | TG                | TG                 | AC                 | GG                 | AG                 | AG               | TC                 | TC               | TC                | GG               |
| Durriese                               | CC                | TG                | TC                 | AG                | TG                | GG                 | AA                 | AG                 | GG                 | AG               | TC                 | TT               | TC                | AG               |
| Forgiariin                             | TC                | TT                | TC                 | AA                | TT                | TG                 | AC                 | AG                 | AA                 | GG               | TC                 | TC               | TC                | AG               |
| Fumai                                  | TC                | TT                | TC                 | AA                | TT                | TG                 | AA                 | AG                 | AA                 | AG               | TC                 | TC               | TC                | AG               |
| Gran Rap Neri                          | TT                | TT                | TT                 | AG                | GG                | TG                 | AA                 | GG                 | AG                 | AA               | TC                 | TT               | TC                | GG               |
| Malvasia Istriana                      | TC                | GG                | CC                 | AG                | TG                | TT                 | CC                 | AA                 | AG                 | GG               | CC                 | CC               | TC                | AG               |
| Mocula                                 | TT                | TT                | TC                 | AG                | TG                | GG                 | AC                 | AG                 | AG                 | AG               | CC                 | TT               | TC                | AG               |
| Negrat                                 | TC                | TT                | TT                 | AA                | TG                | TT                 | AC                 | AA                 | AG                 | AA               | TC                 | TC               | CC                | AG               |
| Nerata                                 | TT                | GG                | TT                 | AA                | TT                | TG                 | AC                 | AG                 | GG                 | GG               | TT                 | TT               | CC                | AG               |
| Nigrut                                 | TT                | TT                | TC                 | AG                | TG                | TG                 | AC                 | AG                 | AG                 | AG               | TC                 | TC               | TC                | GG               |
| Palomba Nera                           | TT                | TG                | TC                 | GG                | TG                | TT                 | AC                 | AG                 | AG                 | AA               | TT                 | TC               | TC                | AG               |
| Piccola                                | TC                | TG                | TT                 | GG                | TG                | TG                 | AA                 | AG                 | AG                 | AG               | TC                 | TC               | TC                | GG               |
| Piccola Nera                           | CC                | TG                | TT                 | AG                | TG                | GG                 | AC                 | AG                 | AG                 | CC               | CC                 | CC               | CC                | GG               |
| Piciale                                | CC                | TT                | TC                 | AA                | TG                | TG                 | AC                 | AG                 | AG                 | AG               | TC                 | TC               | CC                | GG               |
| Picolit                                | TT                | GG                | TT                 | AG                | GG                | AG                 | AA                 | AG                 | AA                 | AG               | TC                 | CC               | TC                | AG               |
| Piculi Neri                            | CC                | TG                | TT                 | AG                | GG                | TG                 | AA                 | AG                 | AA                 | AA               | TC                 | TC               | TC                | GG               |
| Pignolo                                | TT                | TG                | TT                 | AA                | TT                | GG                 | AA                 | AG                 | AA                 | AA               | TT                 | TT               | TC                | GG               |
| Pinella                                | TC                | TG                | TC                 | GG                | GG                | TG                 | CC                 | AA                 | AA                 | AG               | CC                 | TC               | CC                | GG               |
| Polposa                                | TC                | TT                | TT                 | AA                | TT                | TG                 | AA                 | AA                 | AA                 | AA               | TT                 | TC               | CC                | AA               |
| Refosco Bianco                         | TC                | GG                | TT                 | AA                | TT                | GG                 | AA                 | AG                 | AG                 | AA               | TC                 | TC               | TC                | AA               |
| Refosco dal Peduncolo Rosso            | TC                | TT                | CC                 | AG                | TG                | TG                 | AC                 | AG                 | AG                 | AG               | TC                 | TT               | CC                | GG               |
| Refosco Nostrano                       | CC                | TG                | TT                 | AA                | TT                | GG                 | AA                 | AG                 | AG                 | AA               | TC                 | TC               | TC                | AA               |
| Refosco di Rausscedo                   | TC                | TG                | TT                 | AG                | TT                | TG                 | AA                 | AA                 | AA                 | AA               | TT                 | TC               | TC                | AA               |
| Ribolla Gialla                         | TC                | GG                | TC                 | AG                | TG                | GG                 | CC                 | AG                 | AA                 | AG               | CC                 | CC               | CC                | AG               |
| Riunçit                                | TC                | GG                | CC                 | GG                | TG                | GG                 | CC                 | AG                 | GG                 | GG               | TC                 | CC               | TC                | GG               |
| Sagrestana                             | TT                | TG                | TT                 | AA                | TG                | TG                 | AA                 | AG                 | AG                 | AG               | TC                 | CC               | TC                | AA               |
| Zimmettraube Blau (Sbulzina)           | TT                | TG                | TC                 | GG                | GG                | TG                 | AA                 | AA                 | AG                 | GG               | CC                 | TT               | TT                | AG               |
| Schioppettino                          | TC                | GG                | TC                 | AG                | GG                | GG                 | AA                 | AG                 | AG                 | AA               | CC                 | CC               | TC                | AG               |
| Sciaglin                               | TT                | TG                | TT                 | AG                | TG                | GG                 | AA                 | AG                 | AG                 | AG               | TC                 | TC               | CC                | AG               |
| Siora                                  | TC                | TG                | TC                 | GG                | TG                | TT                 | AC                 | AG                 | AG                 | AG               | TC                 | CC               | TC                | GG               |
| Tazzelenghe                            | CC                | TG                | TT                 | AA                | TG                | TG                 | AC                 | AG                 | AG                 | AA               | TC                 | TC               | CC                | AG               |
| Terrano                                | TT                | TG                | CC                 | GG                | TG                | TG                 | AC                 | AG                 | AG                 | GG               | TC                 | TT               | TC                | GG               |
| Tintoria Lloyd                         | TT                | TT                | CC                 | AA                | TT                | GG                 | CC                 | AG                 | AG                 | AA               | CC                 | TT               | TC                | GG               |
| Tocai Friulano                         | TC                | TT                | TC                 | AG                | GG                | GG                 | AC                 | GG                 | GG                 | AA               | TC                 | CC               | TC                | AA               |
| Ucelut                                 | TC                | TG                | TC                 | GG                | TG                | TG                 | AC                 | AG                 | AG                 | GG               | TC                 | TT               | TC                | GG               |
| Venere                                 | TT                | TG                | TC                 | AA                | TG                | GG                 | AC                 | AG                 | AG                 | AA               | TT                 | TC               | TT                | AG               |
| Verduzzo Friulano                      | TC                | TT                | TC                 | AA                | TT                | TG                 | AC                 | AG                 | AG                 | AG               | TC                 | TC               | TC                | AA               |
| Vinoso Rosso                           | TC                | TG                | TT                 | AA                | TT                | GG                 | AA                 | AG                 | AG                 | AA               | TC                 | CC               | TC                | AA               |
| Vulva                                  | TC                | TG                | TT                 | AA                | TG                | GG                 | AC                 | AG                 | GG                 | AA               | TC                 | CC               | TC                | AG               |
| <b>Additional varieties</b>            |                   |                   |                    |                   |                   |                    |                    |                    |                    |                  |                    |                  |                   |                  |
| Bianchetta Trevigiana                  | TC                | TT                | CC                 | AG                | TG                | GG                 | AC                 | AG                 | AA                 | AA               | CC                 | CC               | CC                | GG               |
| Garganega                              | TC                | GG                | TC                 | AG                | TT                | TG                 | AA                 | AG                 | AG                 | GG               | TT                 | TC               | TC                | AG               |
| Glera Lunga                            | TC                | TT                | TC                 | AG                | TT                | TG                 | AC                 | AG                 | AG                 | AG               | TC                 | TC               | TC                | GG               |
| Gosstoldi (Robolla)                    | CC                | GG                | TC                 | AG                | TG                | TT                 | AA                 | AG                 | AG                 | GG               | TT                 | TC               | TC                | AG               |
| Heimisch Weiss                         | TC                | AG                | TC                 | AG                | TG                | TG                 | AC                 | AG                 | AG                 | CC               | TC                 | TC               | TC                | AG               |
| Hongler                                | CC                | GG                | TC                 | AA                | TT                | GG                 | AC                 | AG                 | AG                 | AG               | TT                 | TC               | TC                | AG               |
| Klarinca                               | TC                | TG                | TT                 | AA                | TG                | TG                 | AC                 | AG                 | AG                 | AA               | CC                 | TC               | CC                | AG               |
| Marzemino                              | TT                | TT                | TC                 | AG                | TG                | TG                 | AA                 | AG                 | AG                 | GG               | TC                 | TT               | TC                | GG               |
| Sauvignon                              | CC                | TT                | CC                 | GG                | TG                | GG                 | AC                 | AG                 | AG                 | AA               | TC                 | TC               | TC                | AG               |
| Teroldego                              | TT                | TG                | CC                 | AA                | TT                | TG                 | AA                 | AG                 | GG                 | AG               | TT                 | TC               | TC                | AG               |
| Traminer                               | TC                | TT                | TC                 | AG                | TG                | TG                 | AC                 | AG                 | AA                 | AA               | CC                 | TC               | TC                | AG               |
| Vela pergola (Volovnik)                | TT                | TG                | TC                 | AG                | TG                | TG                 | CC                 | GG                 | AG                 | GG               | TT                 | TC               | TC                | AA               |
| Vulpea                                 | CC                | TG                | TC                 | AG                | TG                | TG                 | AC                 | GG                 | AG                 | AG               | TC                 | CC               | TC                | GG               |
| <b>Supporting trios</b>                |                   |                   |                    |                   |                   |                    |                    |                    |                    |                  |                    |                  |                   |                  |
| Raboso Piave                           | TT                | TG                | TT                 | AA                | TT                | GG                 | AC                 | AG                 | GG                 | AG               | CC                 | TC               | TT                | GG               |
| Raboso Veronese                        | TC                | TG                | TT                 | AA                | TT                | TG                 | AA                 | AA                 | AG                 | AG               | TC                 | TT               | TC                | GG               |
| Marzemina Bianca                       | TC                | TG                | TC                 | AA                | TT                | TT                 | AA                 | AA                 | AA                 | GG               | TT                 | TC               | TC                | AG               |
| <b>Supporting trios</b>                |                   |                   |                    |                   |                   |                    |                    |                    |                    |                  |                    |                  |                   |                  |
| Glera                                  | TC                | TT                | TT                 | GG                | TG                | GG                 | AA                 | GG                 | AG                 | AG               | TT                 | TC               | TC                | GG               |
| Vitouska                               | CC                | TG                | TT                 | GG                | GG                | TG                 | AA                 | AG                 | GG                 | AG               | TC                 | TC               | CC                | GG               |
| Malvasia Bianca Lunga                  | TC                | GG                | TT                 | GG                | GG                | TT                 | AA                 | AA                 | GG                 | GG               | CC                 | TC               | CC                | AG               |
| <b>Supporting trios</b>                |                   |                   |                    |                   |                   |                    |                    |                    |                    |                  |                    |                  |                   |                  |
| Pinot                                  | TT                | TG                | CC                 | GG                | GG                | GG                 | AC                 | AG                 | AG                 | AA               | TC                 | TC               | TC                | AG               |
| Manzoni Bianco                         | TC                | TT                | CC                 | AG                | TG                | GG                 | AC                 | AA                 | AG                 | AG               | CC                 | CC               | CC                | AG               |
| Riesling Weiss                         | TC                | TG                | CC                 | AG                | TG                | TG                 | AA                 | AA                 | AA                 | AG               | CC                 | TC               | CC                | AG               |

Table 5S - Presumed nSSR genotype of candidate parent 'P2' inferred by Colony. Given the very low number of putative full-sibs compared, hypothetical homozygous loci were integrated with a question mark.

| Presumed parent | VVS2 |     | VVMD5 |      | VVMD7 |      | VVMD25 |     | VVMD27 |     | VVMD28 |      | VVMD32 |     | VrZAG62 |     | VrZAG79 |     | ISV2 |     | ISV4 |     | VCMNG4b9 |     |
|-----------------|------|-----|-------|------|-------|------|--------|-----|--------|-----|--------|------|--------|-----|---------|-----|---------|-----|------|-----|------|-----|----------|-----|
| P2              | 143  | 155 | 226   | 226? | 247   | 247? | 247    | 259 | 179    | 185 | 247    | 247? | 263    | 273 | 193     | 203 | 242     | 258 | 151  | 167 | 169  | 177 | 150      | 166 |
